# Supplementary material
Source: HighWire-hosted journal article supplement (https://www.cmajopen.ca/highwire/filestream/87687/field_highwire_adjunct_files/1/2021-0223-2-at.pdf)
Supplement: 2021-0223-2-at.pdf [file 2021-0223-2-at.pdf]

# Food Insecurity Questionnaire

**The following questions ask about the food eaten in your household and during the hospital admission and whether you were able to afford the food you need.**

1. Which of these statements best describes the food eaten in your household in the last 12 months

- 1. Enough of the kinds of food we want to eat
- 2. Enough but not always the kinds of food we want
- 3. Sometimes not enough to eat
- 4. Often not enough to eat
- 5. Decline or refuse to answer

**Below are several statements that people have made about their food situation. For these statements, please tell me whether the statement was often true, sometimes true, or never true for (you/your household) in the last 12 months.**

2. I worried whether our food would run out before I/we got money to buy more in the last 12 months.

- 1. Often true
- 2. Sometimes true
- 3. Never true
- 4. Decline or refuse to answer

3. The food that I/we bought just didn't last, and I/we didn't have money to get more in the last 12 months.

- 1. Often true
- 2. Sometimes true
- 3. Never true
- 4. Decline or refuse to answer

4. I /we couldn't afford to eat balanced meals in the last 12 months.

- 1. Often true
- 2. Sometimes true
- 3. Never true
- 4. Decline or refuse to answer

5. In the last 12 months, did you (or other adults in your household) ever cut the size of your meals or skip meals because there wasn't enough money for food?

- Yes
- No
- Decline or refuse to answer

5a. How often did this happen?

- Almost every month
- Some months but not every month
- Only 1 or 2 months
- Decline or refuse to answer

---

6. In the last 12 months, did you ever eat less than you felt you should because there wasn't enough money for food?

- Yes
- No
- Not sure

---

7. In the last 12 months, were you every hungry but didn't eat because there wasn't enough money for food?

- Yes
- No
- Decline or refuse to answer

---

8. In the last 12 months, did you lose weight because there wasn't enough money for food?

- Yes
- No
- Decline or refuse to answer

---

9. In the last 12 months, did you (or other adults in your household) ever not eat for a whole day because there wasn't enough money for food?

- Yes
- No
- Decline or refuse to answer

---

9a. How often did this happen?

- 1. Almost every month
- 2. Some months but not every month
- 3. Only 1 or 2 months
- 4. Decline or refuse to answer

**The following questions are statements people have made about the food situation of their children. For these statements please tell us whether the statement was OFTEN true, SOMETIMES true or NEVER true in the last 12 months for all children living in your household.**

---

10. I relied on only a few kinds of low-cost food to feed my child (children) because I was /we were running out of money to buy food.

- Often true
- Sometimes true
- Never true
- Decline or refuse to answer

---

11. I couldn't feed my child(ren) a balanced meal, because I couldn't afford that.

- 1. Often true
- 2. Sometimes true
- 3. Never true
- 4. Decline or refuse to answer

---

12. Your child / children were not eating enough because you just couldn't afford enough food.

- 1. Often true
- 2. Sometimes true
- 3. Never true
- 4. Decline or refuse to answer

---

13. In the last 12 months, did you ever cut the size of (your child's / any of the children's) meals because there wasn't enough money for food?

- Yes  
 No  
 Decline or refuse to answer

---

14. In the last 12 months, did your child/any of your children ever skip meals because there wasn't enough money for food?

- Yes  
 No  
 Decline or refuse to answer

---

14a. How often did this happen?

- Almost every month  
 Some months but not every month  
 Only 1 or 2 months  
 Decline or refuse to answer

---

15. In the last 12 months, was your child / were your children ever hungry but you just couldn't afford more food?

- Yes  
 No  
 Decline or refuse to answer

---

16. In the last 12 months, did your child / any of your children ever not eat for a whole day because there wasn't enough money for food?

- Yes  
 No  
 Decline or refuse to answer

---

**The following questions are statements people made about their food situation while their child was admitted in the hospital. For these statements please tell us whether the statement was **OFTEN** true, **SOMETIMES** true or **NEVER** true.**

---

17. I/we could not afford to eat balanced meals during my child's hospital admission.

1. Often true  
 2. Sometimes true  
 3. Never true  
 4. Decline or refuse to answer

---

18. Did you or other adults in your household ever cut the size of your meals or skip meals during the hospital admission, because there wasn't enough money for food?

- Yes  
 No  
 Decline or refuse to answer

---

18a. How often did this happen?

1. Almost every day during the admission  
 2. Some days but not every day  
 3. Decline or refuse to answer

---

19. During the hospital admission, were you ever hungry but didn't eat because there wasn't enough money for food?

- Yes
- No
- Decline or refuse to answer

---

Do you have any other feedback regarding your food situation during your child's hospital admission?

---
